# Supplementary material for: Organic Dye-Derived N, S Co-Doped Porous Carbon Hosts for Effective Lithium Polysulfide Confinement in Lithium–Sulfur Batteries
Source: MDPI journal article supplement (doi:10.3390/nano11112954), 2021-11-04
Supplement: s1 [file s1]

# Supplementary Material

## Organic Dye-Derived N, S Co-doped Porous Carbon Hosts for Effective Lithium Polysulfide Confinement in Lithium–Sulfur Batteries

Eunji Kim <sup>1</sup>, Albert S. Lee <sup>2</sup>, Taewoong Lee <sup>1</sup>, Hyeok Jun Seo <sup>1</sup>, Seongwook Chae <sup>1</sup>, Kihyun Kim <sup>3,\*</sup>, Jun-Woo Park <sup>4,\*</sup>, Seung Geol Lee <sup>1,\*</sup> and Jin Hong Lee <sup>1,\*</sup>

**Citation:** Kim, E.; Lee, A.S.; Lee, T.; Seo, H.J.; Chae, S.; Kim, K.; Park, J.-W.; Lee, S.G.; Lee, J.H. Organic Dye-Derived N, S Co-Doped Porous Carbon Hosts for Effective Lithium Polysulfide Confinement in Lithium–Sulfur Batteries. *Nanomaterials* **2021**, *11*, 2954. <https://doi.org/10.3390/10.3390/nano11112954>

Academic Editor(s): Marc Cretin, Sophie Tingry, Zhenghua Tang

Received: 15 October 2021

Accepted: 02 November 2021

Published: 04 November 2021

**Publisher's Note:** MDPI stays neutral with regard to jurisdictional claims in published maps and institutional affiliations.

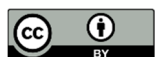

**Copyright:** © 2021 by the authors. Submitted for possible open access publication under the terms and conditions of the Creative Commons Attribution (CC BY) license (<https://creativecommons.org/licenses/by/4.0/>).

- <sup>1</sup> School of Chemical Engineering, Pusan National University, Busan 46421, Korea; eunjikim@pusan.ac.kr (E.K.); wmfrlwk12@pusan.ac.kr (T.L.); seohj@pusan.ac.kr (H.J.S.); swchae0708@pusan.ac.kr (S.C.)
  - <sup>2</sup> Materials Architecturing Research Center, Korea Institute of Science and Technology, Seoul 02792, Korea; aslee@kist.re.kr
  - <sup>3</sup> Department of Materials Engineering and Convergence Technology, Gyeongsang National University, Jinju 52828, Korea
  - <sup>4</sup> Next Generation Battery Research Center, Korea Electrotechnology Research Institute (KERI), Changwon 51543, Korea
- \* Correspondence: kihyun@gnu.ac.kr (K.K.); parkjw@keri.re.kr (J.-W.P.); seunggeol.lee@pusan.ac.kr (S.G.L.); jinhong.lee@pusan.ac.kr (J.H.L.)

| Sample | C 1s<br>(atomic %) | O 1s<br>(atomic %) | N 1s<br>(atomic %) | S 2p<br>(atomic %) |
|--------|--------------------|--------------------|--------------------|--------------------|
| MBGO5  | 71.07              | 26.98              | 1.36               | 0.59               |
| MBGO10 | 71.58              | 25.27              | 1.91               | 0.97               |
| MBGO20 | 72.18              | 21.10              | 4.39               | 2.33               |
| MBGO40 | 72.30              | 18.56              | 5.82               | 3.32               |

**Table S1.** Elemental ratios of MBGOs with different methylene blue contents.

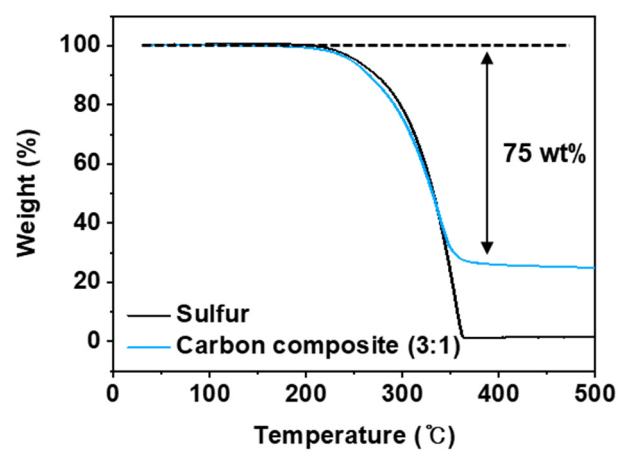

**Figure S1.** TGA thermograms of carbon composite and elemental sulfur.

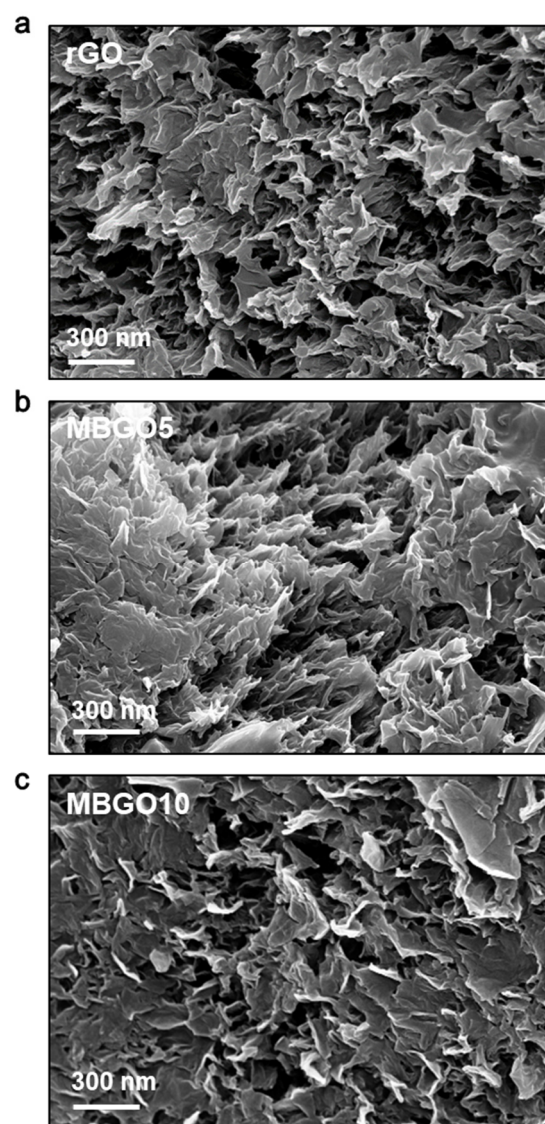

**Figure S2.** SEM images of (a) rGO, (b) MBGO5 and (c) MBGO10.

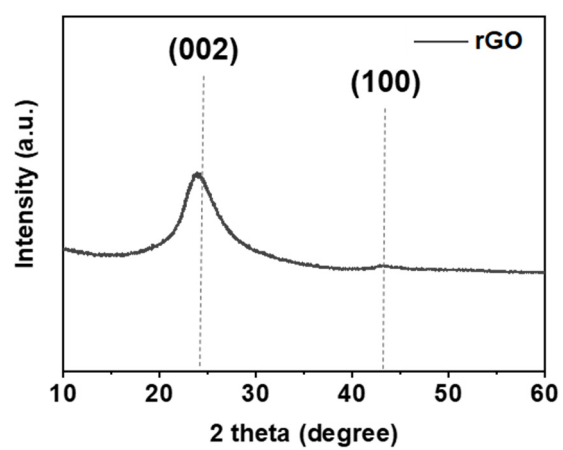

**Figure S3.** XRD pattern of rGO sample.

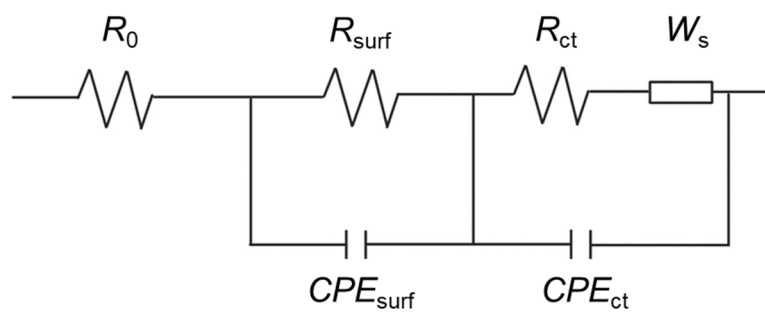

**Figure S4.** Equivalent circuit model of after cycling.

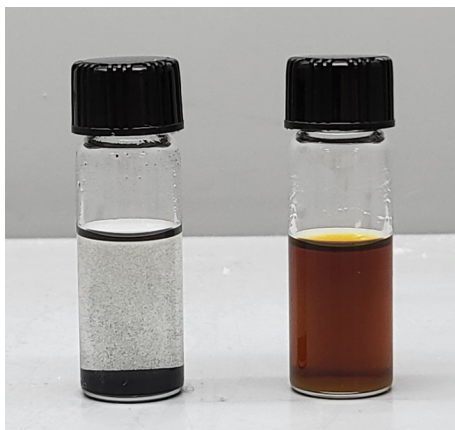

**Figure S5.** Digital photo image of the confined lithium polysulfides within MBGO20.
